# Supplementary material
Source: publisher figshare collection journal article supplement (https://karger.figshare.com/ndownloader/files/26704613)
Supplement: Supplementary file 1 [file 26704613]

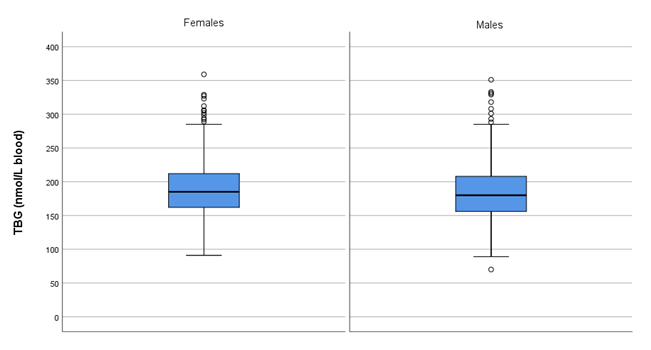
Fig. S3. TBG concentrations of reference subjects divided by subgroup: females and males.

Measurements were performed in (full) blood.
Data are presented in boxplots.
